# Supplementary material
Source: PubMed Central journal article supplement (PMC5696092)
Supplement: NIHMS918233-supplement-supporting_information.pdf [file NIHMS918233-supplement-supporting_information.pdf]

Supporting Information

**Models for Unsymmetrical Active Sites in Metalloproteins: Structural, Redox, and Magnetic, Properties of Bimetallic Complexes with  $M^{II}-(\mu-OH)-Fe^{III}$  Cores**

Yohei Sano<sup>†</sup>, Nathanael Lau<sup>†</sup>, Andrew C. Weitz<sup>‡</sup>, Joseph W. Ziller<sup>†</sup>, Michael P. Hendrich<sup>\*‡</sup>, A.S. Borovik<sup>\*†</sup>

<sup>†</sup>*Department of Chemistry, University of California – Irvine, 1102 Natural Sciences II, Irvine, CA 92697-2025, United States*

<sup>‡</sup>*Department of Chemistry, Carnegie Mellon University, Pittsburgh, PA 15213, United States*

E-mail: [aborovik@uci.edu](mailto:aborovik@uci.edu)

**Contents**

|                                                      |           |
|------------------------------------------------------|-----------|
| <b>Crystallography</b> .....                         | <b>S2</b> |
| <b>Table S1</b> .....                                | <b>S3</b> |
| <b>Figure S1</b> .....                               | <b>S4</b> |
| <b>Figure S2</b> .....                               | <b>S4</b> |
| <b>Electron Paramagnetic Resonance Studies</b> ..... | <b>S5</b> |
| <b>Figure S3</b> .....                               | <b>S5</b> |
| <b>Figure S4</b> .....                               | <b>S6</b> |
| <b>References</b> .....                              | <b>S6</b> |

## Crystallography

**General Methods.** Single crystals were mounted on a glass fiber or loop and transferred to a Bruker SMART APEX II diffractometer. The APEX2<sup>1</sup> program package was used to determine the unit-cell parameters and for data collection. The raw frame data was processed using SAINT<sup>2</sup> and SADABS<sup>3</sup> to yield the reflection data file. Subsequent calculations were carried out using the SHELXTL<sup>4</sup> program. The structures were solved by direct methods and refined on  $F^2$  by full-matrix least-squares techniques. The analytical scattering factors<sup>5</sup> for neutral atoms were used throughout the analyses. Hydrogen atom H(1) was located from a difference-Fourier map and refined ( $x, y, z$  and  $U_{iso}$ ). The remaining hydrogen atoms were included using a riding model. In addition to the triflate counterion there were two molecules of dichloromethane solvent present. The molecular structures of [(TMTACN)M<sup>II</sup>-( $\mu$ -OH)-Fe<sup>III</sup>MST]OTf (M<sup>II</sup> = Fe, Mn) have already been reported.<sup>6</sup>

**Structure of [(TMTACN)Co<sup>II</sup>-( $\mu$ -OH)-Fe<sup>III</sup>MST]OTf.** An orange crystal of approximate dimensions 0.106 x 0.253 x 0.280 mm was analyzed. The diffraction symmetry was *mmm* and the systematic absences were consistent with the triclinic space group  $P\bar{1}$  that was later determined to be correct. Least-squares analysis yielded  $wR2 = 0.0709$  and  $Goof = 1.037$  for 738 variables refined against 12670 data (0.74Å),  $R1 = 0.0265$  for those 11382 data with  $I > 2.0\sigma(I)$ .

**Structure of [(TMTACN)Ni<sup>II</sup>-( $\mu$ -OH)-Fe<sup>III</sup>MST]OTf.** An orange crystal of approximate dimensions 0.114 x 0.152 x 0.208 mm was analyzed. The diffraction symmetry was *mmm* and the systematic absences were consistent with the triclinic space group  $P\bar{1}$  that was later determined to be correct. Least-squares analysis yielded  $wR2 = 0.1118$  and  $Goof = 1.036$  for 660 variables refined against 11911 data (0.77Å),  $R1 = 0.0426$  for those 9209 data with  $I > 2.0\sigma(I)$ .

**Structure of [(TMTACN)Cu<sup>II</sup>-( $\mu$ -OH)-Fe<sup>III</sup>MST]OTf.** An orange crystal of approximate dimensions 0.156 x 0.376 x 0.426 mm was analyzed. The diffraction symmetry was *mmm* and the systematic absences were consistent with the orthorhombic space group *Pbca* that was later determined to be correct. Least-squares analysis yielded  $wR2 = 0.1947$  and  $Goof = 1.217$  for 719 variables refined against 11851 data (0.83Å),  $R1 = 0.0907$  for those 9810 data with  $I > 2.0\sigma(I)$ .

**Structure of [(TMTACN)Zn<sup>II</sup>-( $\mu$ -OH)-Fe<sup>III</sup>MST]OTf.** An orange crystal of approximate dimensions 0.136 x 0.149 x 0.168 mm was analyzed. The diffraction symmetry was *mmm* and the systematic absences were consistent with the triclinic space group  $P\bar{1}$  that was later determined to be correct. Least-squares analysis yielded  $wR2 = 0.1809$  and  $Goof = 1.048$  for 672 variables refined against 13151 data (0.75Å),  $R1 = 0.0660$  for those 10084 data with  $I > 2.0\sigma(I)$ .

**Table S1.** Crystallographic data for [(TMTACN)M<sup>II</sup>-(μ-OH)-Fe<sup>III</sup>MST]<sup>+</sup> complexes (M<sup>II</sup> = Co<sup>II</sup>, Ni<sup>II</sup>, Cu<sup>II</sup>, Zn<sup>II</sup>).

|                                        | [(TMTACN)Co <sup>II</sup> -<br>(μ-OH)-Fe <sup>III</sup> MST]OTf                                                                                  | [(TMTACN)Ni <sup>II</sup> -<br>(μ-OH)-Fe <sup>III</sup> MST]OTf                                                                                  | [(TMTACN)Cu <sup>II</sup> -<br>(μ-OH)-Fe <sup>III</sup> MST]OTf                                                                                                 | [(TMTACN)Zn <sup>II</sup> -<br>(μ-OH)-Fe <sup>III</sup> MST]OTf                                                                                                   |
|----------------------------------------|--------------------------------------------------------------------------------------------------------------------------------------------------|--------------------------------------------------------------------------------------------------------------------------------------------------|-----------------------------------------------------------------------------------------------------------------------------------------------------------------|-------------------------------------------------------------------------------------------------------------------------------------------------------------------|
| formula                                | [C <sub>42</sub> H <sub>67</sub> CoFeN <sub>7</sub> O <sub>7</sub> S <sub>3</sub> ]<br>[CF <sub>3</sub> SO <sub>3</sub> ] • (CH <sub>3</sub> CN) | [C <sub>42</sub> H <sub>67</sub> NiFeN <sub>7</sub> O <sub>7</sub> S <sub>3</sub> ]<br>[CF <sub>3</sub> SO <sub>3</sub> ] • (CH <sub>3</sub> CN) | [C <sub>42</sub> H <sub>67</sub> CuFeN <sub>7</sub> O <sub>7</sub> S <sub>3</sub> ]<br>[CF <sub>3</sub> SO <sub>3</sub> ] • 3(CH <sub>2</sub> Cl <sub>2</sub> ) | [C <sub>42</sub> H <sub>67</sub> ZnFeN <sub>7</sub> O <sub>7</sub> S <sub>3</sub> ]<br>[CF <sub>3</sub> SO <sub>3</sub> ] • 1.5(CH <sub>2</sub> Cl <sub>2</sub> ) |
| fw                                     | 1183.11                                                                                                                                          | 1182.89                                                                                                                                          | 1401.44                                                                                                                                                         | 1275.88                                                                                                                                                           |
| T (K)                                  | 88(2) K                                                                                                                                          | 88(2) K                                                                                                                                          | 143(2) K                                                                                                                                                        | 88(2) K                                                                                                                                                           |
| crystal system                         | Triclinic                                                                                                                                        | Triclinic                                                                                                                                        | Orthorhombic                                                                                                                                                    | Triclinic                                                                                                                                                         |
| space group                            | <i>P</i> $\bar{1}$                                                                                                                               | <i>P</i> $\bar{1}$                                                                                                                               | <i>Pbca</i>                                                                                                                                                     | <i>P</i> $\bar{1}$                                                                                                                                                |
| a (Å)                                  | 11.6341(5)                                                                                                                                       | 11.6180(16)                                                                                                                                      | 17.047(2)                                                                                                                                                       | 11.8947(6)                                                                                                                                                        |
| b (Å)                                  | 15.6144(6)                                                                                                                                       | 15.620(2)                                                                                                                                        | 27.052(4)                                                                                                                                                       | 15.7190(9)                                                                                                                                                        |
| c (Å)                                  | 15.7195(6)                                                                                                                                       | 15.659(2)                                                                                                                                        | 28.045(4)                                                                                                                                                       | 15.8049(9)                                                                                                                                                        |
| α (°)                                  | 80.3235(4)                                                                                                                                       | 80.0664(18)                                                                                                                                      | 90                                                                                                                                                              | 82.0438(7)                                                                                                                                                        |
| β (°)                                  | 69.3935(4)                                                                                                                                       | 69.2828(17)                                                                                                                                      | 90                                                                                                                                                              | 88.8630(7) <sup>o</sup> .                                                                                                                                         |
| γ (°)                                  | 89.8327(4)                                                                                                                                       | 89.7521(18)                                                                                                                                      | 90                                                                                                                                                              | 70.7837(7)                                                                                                                                                        |
| Z                                      | 2                                                                                                                                                | 2                                                                                                                                                | 8                                                                                                                                                               | 2                                                                                                                                                                 |
| V (Å <sup>3</sup> )                    | 2629.97(18)                                                                                                                                      | 2613.1(6)                                                                                                                                        | 12933(3)                                                                                                                                                        | 2762.5(3)                                                                                                                                                         |
| δ <sub>calc</sub> (mg/m <sup>3</sup> ) | 1.494                                                                                                                                            | 1.503                                                                                                                                            | 1.440                                                                                                                                                           | 1.534                                                                                                                                                             |
| indep. reflections                     | 12670                                                                                                                                            | 11911                                                                                                                                            | 11851                                                                                                                                                           | 13151                                                                                                                                                             |
| R1                                     | 0.0265                                                                                                                                           | 0.0426                                                                                                                                           | 0.0907                                                                                                                                                          | 0.0660                                                                                                                                                            |
| wR2                                    | 0.0709                                                                                                                                           | 0.1118                                                                                                                                           | 0.1947                                                                                                                                                          | 0.1809                                                                                                                                                            |
| Goof                                   | 1.037                                                                                                                                            | 1.036                                                                                                                                            | 1.217                                                                                                                                                           | 1.048                                                                                                                                                             |
| CCDC#                                  | 1571442                                                                                                                                          | 1571443                                                                                                                                          | 1571445                                                                                                                                                         | 1571444                                                                                                                                                           |

$$wR2 = [\Sigma[w(F_o^2 - F_c^2)^2] / \Sigma[w(F_o^2)^2]]^{1/2}$$

$$R1 = \Sigma||F_o| - |F_c|| / \Sigma|F_o|$$

Goof = S =  $[\Sigma[w(F_o^2 - F_c^2)^2] / (n-p)]^{1/2}$  where n is the number of reflections and p is the total number of parameters refined.

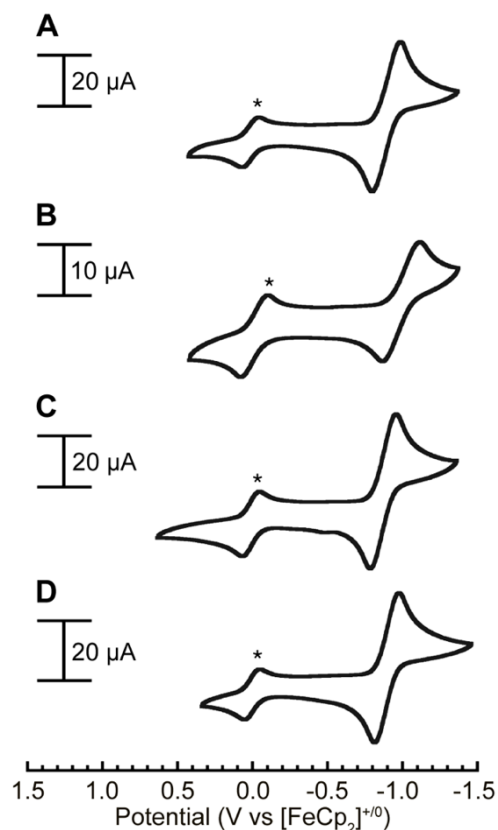

**Figure S1.** Cyclic voltammograms of (A) [(TMTACN)Co<sup>II</sup>-(μ-OH)-Fe<sup>III</sup>MST]<sup>+</sup>, (B) [(TMTACN)Ni<sup>II</sup>-(μ-OH)-Fe<sup>III</sup>MST]<sup>+</sup>, (C) [(TMTACN)Cu<sup>II</sup>-(μ-OH)-Fe<sup>III</sup>MST]<sup>+</sup>, and (D) [(TMTACN)Zn<sup>II</sup>-(μ-OH)-Fe<sup>III</sup>MST]<sup>+</sup>. The cyclic voltammograms were collected at 100 mV s<sup>-1</sup> in the presence of [FeCp<sub>2</sub>]<sup>+/0</sup> (\*).

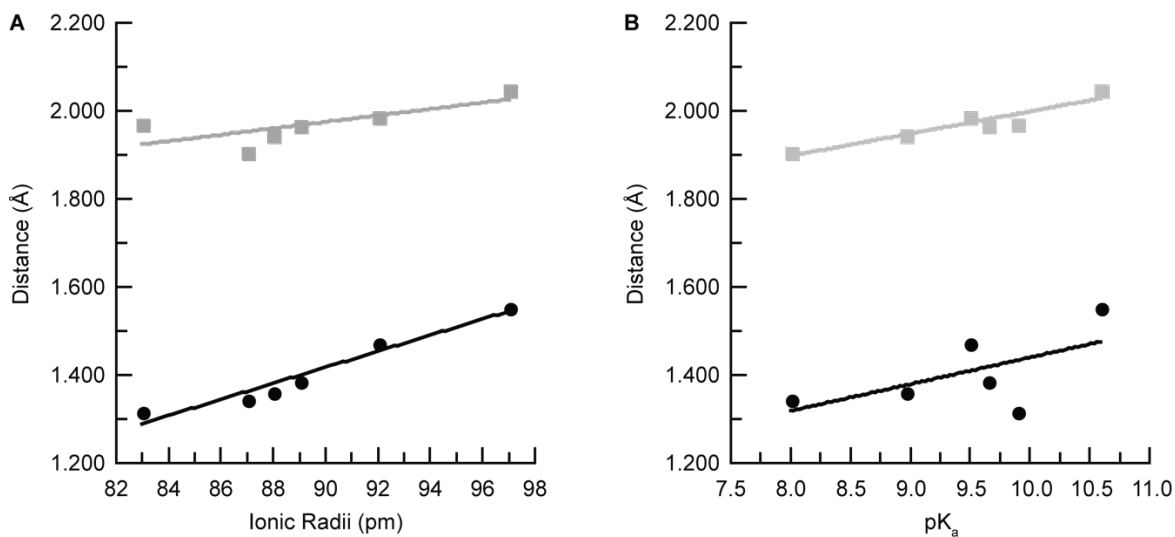

**Figure S2.** Plots of displacement of the M<sup>II</sup> ion from the plane formed from the N atoms of the TMTACN ligand (black circles) and M<sup>II</sup>-O1 bond length (gray squares) versus (A) the ionic radii of the M<sup>II</sup> ions<sup>7</sup> and the (B) pK<sub>a</sub> values for the [M<sup>II</sup>(H<sub>2</sub>O)<sub>6</sub>]<sup>2+</sup> complexes.<sup>8</sup>

## Electron Paramagnetic Resonance Studies.

**[Mn<sup>II</sup>(OH)Fe<sup>III</sup>]<sup>+</sup>.** No EPR signals were observed from the [Mn<sup>II</sup>(OH)Fe<sup>III</sup>]<sup>+</sup> complex in parallel- or perpendicular-modes for temperatures < 20 K. For temperatures greater than 20 K, a parallel-mode signal at  $g = 11$  appeared and grew in intensity with increasing temperature (Figure S4). The signal is in the region expected for  $S = 2$  signals. The absence of this signal below 20 K and growth at higher temperatures is indicative of an antiferromagnetic exchange coupling between the  $S = 5/2$  Fe<sup>III</sup> and  $S = 5/2$  Mn<sup>II</sup> to give a spin coupled  $S_C = 0$  ground state, and  $S_C = 2$  as one of the excited state spin manifolds. The temperature dependence of the spectrum was measured. The inset of Figure S4 shows a plot of signal intensity  $\times$  temperature as a function of temperature where the ordinate axis is proportional to the percentage population of the  $S_C = 2$  manifold. This percentage was calculated as a function of temperature based on eq 1 (see main text) and also plotted. The solid-line plot indicated an exchange coupling of  $J = +35(3)$  cm<sup>-1</sup> with the uncertainty indicated by the dashed lines on the figure. The simulation overlaid on the spectra uses eq 1 with the Fe<sup>III</sup> parameters of [Zn<sup>II</sup>(OH)Fe<sup>III</sup>]<sup>+</sup> and the Mn<sup>II</sup> parameters listed in Table 3 (Figure S4). The simulations use a concentration in quantitative agreement with the complex added to solution. The simulation of a previously published EPR spectrum of Mn<sup>II</sup>TMACN gave  $|D| = 0.1$  cm<sup>-1</sup>,<sup>7</sup> which is close to the value derived from the simulations of [Mn<sup>II</sup>(OH)Fe<sup>III</sup>]<sup>+</sup>. The  $g = 11$  signal is not from the  $S_C = 3$  spin manifold because the simulations for this assignment did not agree with the position or intensity of the data.

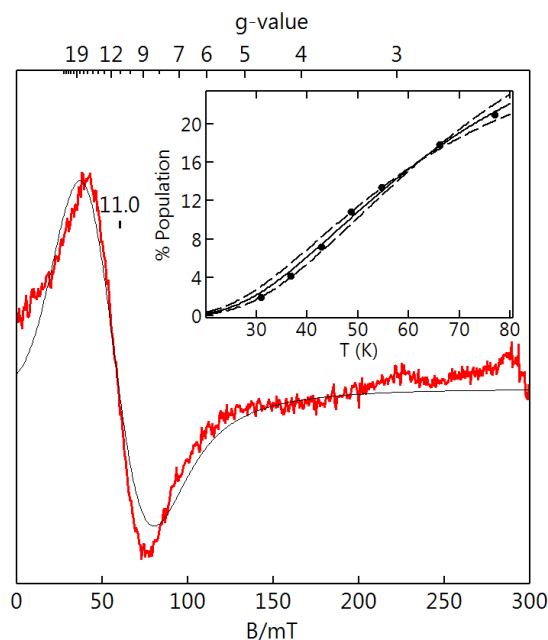

**Figure S3.** EPR spectra (red) and simulations (black) of [Mn<sup>II</sup>(OH)Fe<sup>III</sup>]<sup>+</sup> for sample temperature of 66 K. Microwave parameters: 9.334 GHz, 20 mW,  $B_1 \parallel B$ . See Table 3 in main text for simulation parameters. The inset shows signal intensity  $\times$  temperature and the corresponding percent population of  $S = 2$  for  $J = +35(3)$  cm<sup>-1</sup>. The dashed lines represent the error in  $J$ .

**[Fe<sup>II</sup>(OH)Fe<sup>III</sup>]<sup>+</sup>.** The EPR spectrum of the [Fe<sup>II</sup>(OH)Fe<sup>III</sup>]<sup>+</sup> complex shows a signal with all  $g$ -values < 2 (Figure S5). The low  $g$ -values are typical of a mixed-valence species with  $S = 2$  Fe<sup>II</sup> antiferromagnetically exchange coupled to  $S = 5/2$  Fe<sup>III</sup>, which results in the  $S_C = 1/2$  spin state lowest in energy. The  $g$ -tensor from the  $S_C = 1/2$  simulation is  $\mathbf{g} = (1.91, 1.68, 1.49)$ . The poor match to data suggests broadening by intermolecular interactions or sample heterogeneity. For temperatures > 20 K, signals from excited spin manifolds are not observed due to signal broadening. The saturation behavior of the ground state  $S_C = 1/2$  signal was measured as a function of temperature to determine the exchange coupling constant  $J$ . A series of EPR spectra were recorded at multiple microwave powers and multiple temperatures. The power dependence of the signal was fit to determine the power at half-saturation ( $P_{1/2}$ ) at each temperature. The  $P_{1/2}$  values as a function of temperature data were then fit using the function, where  $A = 5.2$   $\mu$ W/K,  $B = 63$  W, and  $\Delta = 56$  K (39 cm<sup>-1</sup>). The first and second terms are due to the direct and Orbach

relaxation processes, respectively, and  $\Delta$  is the energy of the excited  $S_C = 3/2$  manifold. From the value of  $\Delta$ , the exchange coupling constant of  $J = +26(4) \text{ cm}^{-1}$  was calculated, with the uncertainty in the value indicated by the dashed lines on the figure.

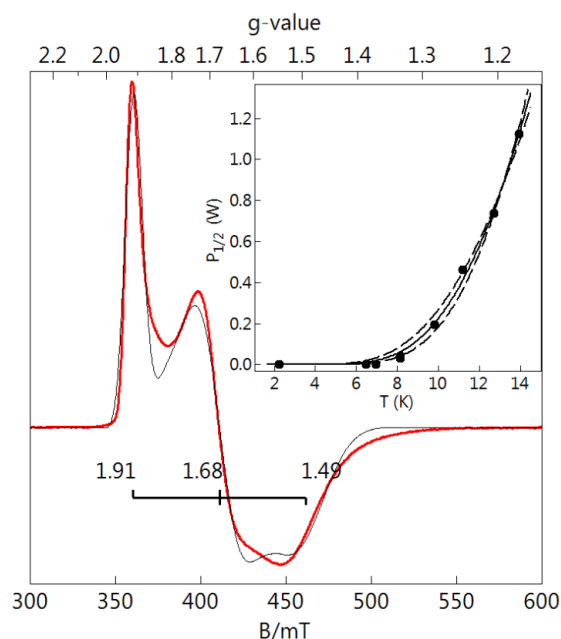

**Figure S4.** EPR spectra (red) and simulations (black) of  $[\text{Fe}^{\text{II}}(\text{OH})\text{Fe}^{\text{III}}]^+$  for a sample temperature of 7 K. Microwave parameters: 9.644 GHz, 0.2 mW,  $\mathbf{B}_1 \perp \mathbf{B}$ . For the  $S_C = 1/2$  simulation,  $\mathbf{g} = (1.91, 1.68, 1.49)$ . The inset shows the power at half saturation versus temperature, and a fit with for the  $S_C = 3/2$  state at  $39 \text{ cm}^{-1}$ , see main text for further information.

## References

- (1) APEX2 Version 2010.3-0, Bruker AXS, Inc.; Madison, WI 2010.
- (2) SAINT Version 7.68a, Bruker AXS, Inc.; Madison, WI 2009.
- (3) Sheldrick, G. M. SADABS, Version 2008/1, Bruker AXS, Inc.; Madison, WI 2008.
- (4) Sheldrick, G. M. SHELXTL, Version 2008/4, Bruker AXS, Inc.; Madison, WI 2008.
- (5) International Tables for X-Ray Crystallography 1992, Vol. C., Dordrecht: Kluwer Academic Publishers.
- (6) Sano, Y.; Weitz, A. C.; Ziller, J. W.; Hendrich, M. P.; Borovik, A. S. Unsymmetrical Bimetallic Complexes with  $\text{M}^{\text{II}}-(\mu\text{-OH})-\text{M}^{\text{III}}$  Cores ( $\text{M}^{\text{II}}\text{M}^{\text{III}} = \text{Fe}^{\text{II}}\text{Fe}^{\text{III}}, \text{Mn}^{\text{II}}\text{Fe}^{\text{III}}, \text{Mn}^{\text{II}}\text{Mn}^{\text{III}}$ ): Structural, Magnetic, and Redox Properties. *Inorg. Chem.* **2013**, *52*, 10229–10231.
- (7) Shannon, R. D. Revised effective ionic radii and systematic studies of interatomic distances in halides and chalcogenides. *Acta Crystallogr. Sect. A* **1976**, *32*, 751–767.
- (8) Jackson, V. E.; Felmy, A. R.; Dixon, D. A. Prediction of the  $\text{pK}_a$ 's of Aqueous Metal Ion +2 Complexes. *J. Phys. Chem. A* **2015**, *119*, 2926–2939.
- (9) Flassbeck, C.; Wieghardt, K.; Bill, E.; Butzlaff, C.; Trautwein, A. X.; Nuber, B.; Weiss, J. Coordination of 4,7-bis(2-hydroxybenzyl)-1-oxa-4,7-diazacyclononane ( $\text{LH}_2$ ) with manganese(II) and -(III) and zinc(II). Crystal structure of  $[(\text{LH})_2\text{Zn}_2(\mu\text{-OH})](\text{PF}_6)_2 \cdot 0.5\text{CH}_3\text{OH}$ . *Inorg. Chem.* **1992**, *31*, 21–26.
